# Supplementary material for: Pharmacological Evidence Suggests That Slo3 Channel Is the Principal K+ Channel in Boar Spermatozoa
Source: MDPI journal article supplement (doi:10.3390/ijms24097806), 2023-04-25
Supplement: s1 [file s1]

## Supplementary figures

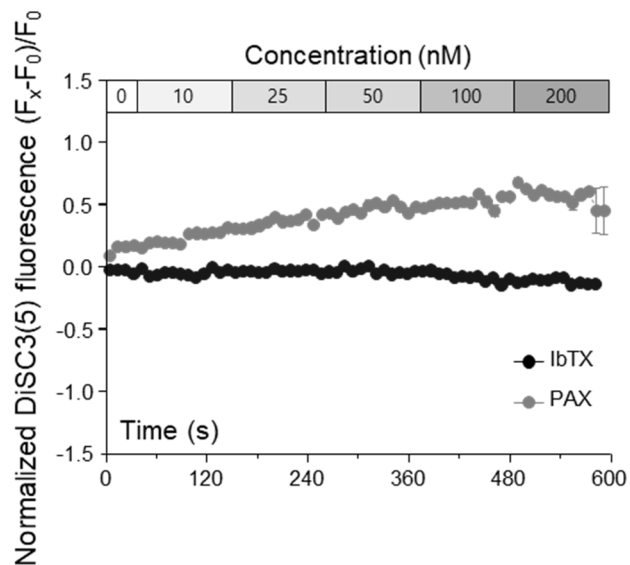

Supplementary Figure S1. Effect of specific Slo1 b lockers on boar sperm membrane potential

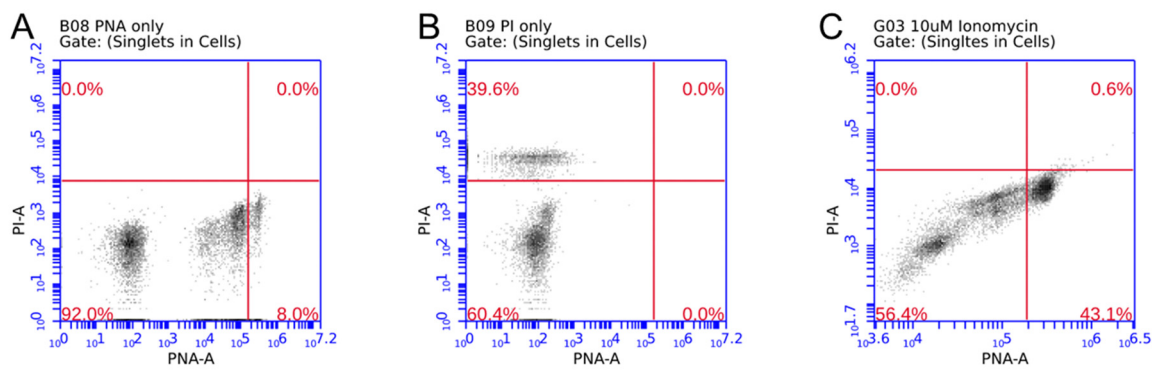

Supplementary Figure S2. PNA and PI single staining conditions and AR positive control

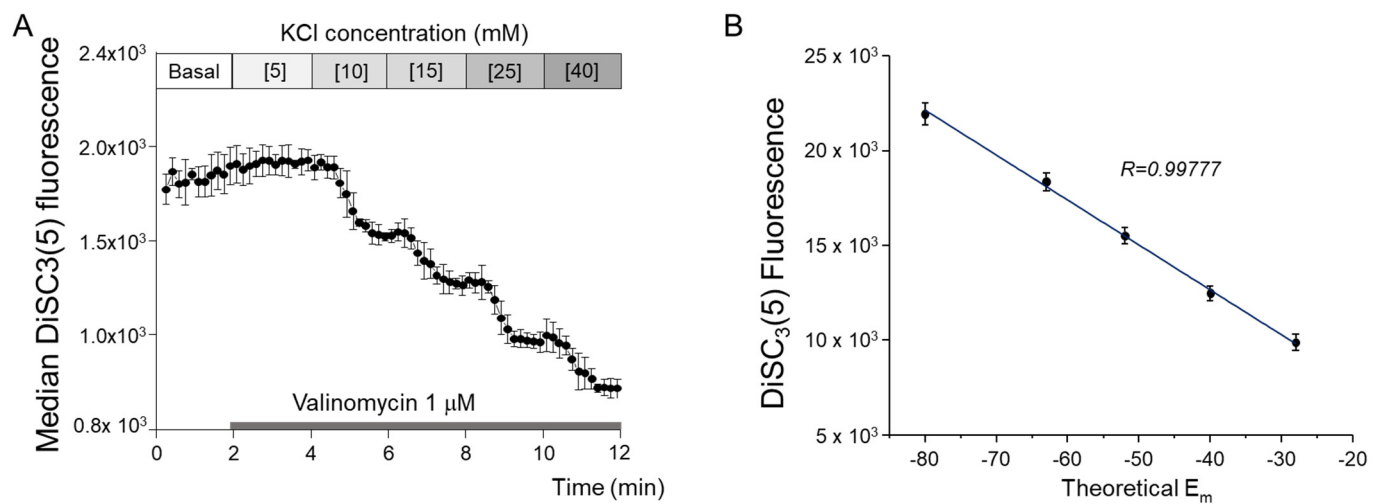

Supplementary Figure S3. Control experiments for DiSC3(5) fluorescence measurement of membrane potential.

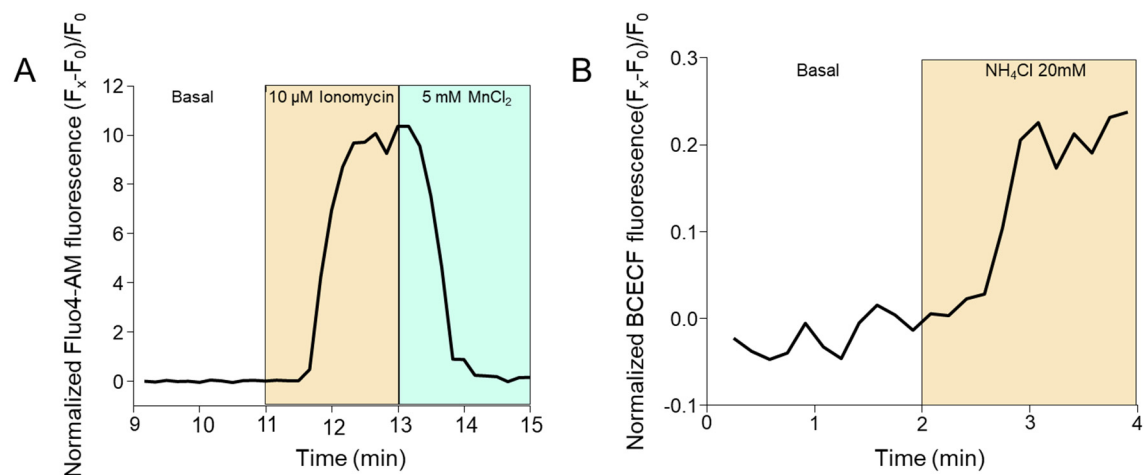

**Supplementary Figure S4. Control experiments of fluorescence measurement for intracellular calcium (A, Fluo4-AM) and pH (B, BCECF).**

**Supplementary Table S1. Summary of the treatment concentrations**

| Technique | Parameter     | Dye                                                   |    | Research question                                                 | Medium         | Treatment                                                                                                                                                                                                                                                  | Treat-<br>ment du-<br>ration          |
|-----------|---------------|-------------------------------------------------------|----|-------------------------------------------------------------------|----------------|------------------------------------------------------------------------------------------------------------------------------------------------------------------------------------------------------------------------------------------------------------|---------------------------------------|
| CASA      | Motility      | NA                                                    | a) | Effects of LDD175 and NS1619 on motility and kinematic parameters | HTF            | 0, 1, 10, 100 $\mu$ M LDD175;<br>0, 1, 10, 100 $\mu$ M NS1619                                                                                                                                                                                              | 5min                                  |
| TLFC      | Em            | DiSC3(5)<br>(25 nM)                                   | a) | Em vs $[K^+]$ calibration curve                                   | NonCAP         | <ul style="list-style-type: none"> <li>0, 5, 10,15, 25, 40 mM KCl</li> <li>[1<math>\mu</math>M valinomycin was added at 2min time point]</li> </ul>                                                                                                        | 2min for each treatment concentration |
|           |               |                                                       | b) | Em dose response to different $K^+$ channel modulators            |                | <ul style="list-style-type: none"> <li>0, 1, 10, 50, 100 <math>\mu</math>M LDD175</li> <li>0, 1, 10, 50, 100 <math>\mu</math>M NS1619</li> <li>0, 10, 25, 50, 100, 200 nM IbTx</li> <li>0, 10, 25, 50, 100, 200 nM PAX</li> </ul>                          |                                       |
|           |               |                                                       | c) | Residual traces of $K^+$ current from Slo1                        |                | <ul style="list-style-type: none"> <li>0, 10 <math>\mu</math>M LDD175, 100 nM IbTx</li> <li>0, 100 nM IbTx, 10 <math>\mu</math>M LDD175</li> <li>0, 10 <math>\mu</math>M LDD175, 100 nM PAX</li> <li>0, 100 nM PAX, 10 <math>\mu</math>M LDD175</li> </ul> |                                       |
|           | $[Ca^{2+}]_i$ | Fluo4-AM<br>(5 $\mu$ M),<br>0.02% Plu-<br>ronic F-127 | a) | Identification of $[Ca^{2+}]$ responding sub-population           | NonCAP         | <ul style="list-style-type: none"> <li>Basal, 10 <math>\mu</math>M Ionomycin, 5mM <math>MnCl_2</math></li> </ul>                                                                                                                                           |                                       |
|           |               |                                                       | b) | Slo3 vs intracellular calcium signals                             |                | <ul style="list-style-type: none"> <li>0, 1, 5, 10 <math>\mu</math>M LDD175</li> <li>0, 1, 5, 10, 50, 100 <math>\mu</math>M NS1619</li> </ul>                                                                                                              |                                       |
|           |               |                                                       | c) | Slo3 vs extracellular calcium independent $[Ca^{2+}]$ signals     | Ca-free medium | <ul style="list-style-type: none"> <li>0, 1, 5, 10 <math>\mu</math>M LDD175</li> <li>0, 1, 5, 10, 50, 100 <math>\mu</math>M NS1619</li> </ul>                                                                                                              |                                       |
|           |               |                                                       | d) | Involvement of Slo3 in CatSper current modulation                 | NonCAP         | <ul style="list-style-type: none"> <li>0, 1<math>\mu</math>M NNC, 1, 5, 10 <math>\mu</math>M LDD175</li> <li>0, 1<math>\mu</math>M NNC,5, 10, 50, 100 <math>\mu</math>M NS1619</li> </ul>                                                                  |                                       |

|                |                   |                                      |    |                                                                                                      |        |                                                                                                                                                                                                                                   |     |
|----------------|-------------------|--------------------------------------|----|------------------------------------------------------------------------------------------------------|--------|-----------------------------------------------------------------------------------------------------------------------------------------------------------------------------------------------------------------------------------|-----|
|                |                   |                                      | e) | whether CatSper modulation is due to direct interactions with the chemicals of <i>Em</i> modulations |        | <ul style="list-style-type: none"> <li>0, 20 mM TEA, 1, 5, 10 <math>\mu</math>M LDD175</li> <li>0, 20 mM TEA, 5, 10, 50, 100 <math>\mu</math>M NS1619</li> </ul>                                                                  |     |
|                | [pH] <sub>i</sub> | BCECF-AM (300nM)                     | a) | Identification of pH responding subpopulation                                                        | NonCAP | <ul style="list-style-type: none"> <li>Basal, 20mM NH<sub>4</sub>Cl</li> </ul>                                                                                                                                                    |     |
|                |                   |                                      | b) | pH dose response to different K <sup>+</sup> channel modulators                                      |        | <ul style="list-style-type: none"> <li>0, 1, 10, 50, 100 <math>\mu</math>M LDD175</li> <li>0, 1, 10, 50, 100 <math>\mu</math>M NS1619</li> <li>0, 10, 25, 50, 100, 200 nM IbTx</li> <li>0, 10, 25, 50, 100, 200 nM PAX</li> </ul> |     |
| Flow cytometry | Acrosome reaction | PNA-FITC (5ug/ml),<br>PI (3 $\mu$ M) | a) | effect of LDD175 and NS1619 on AR                                                                    | CAP    | NC, 5 and 10 $\mu$ M LDD175, 50 and 100 $\mu$ M NS1619, PC (10 $\mu$ M Ionomycin)                                                                                                                                                 | 1hr |

NA- not applicable, NC- negative control, PC- positive control, TLFC- time lapse flow cytometry

In TLFC, each bullet point (▪) represents a single treatment series and the treatments/concentrations of it are given in the order.
